# Supplementary material
Source: ML conference proceedings conference paper supplement (https://openreview.net/forum?id=7Yayy5fNLg)

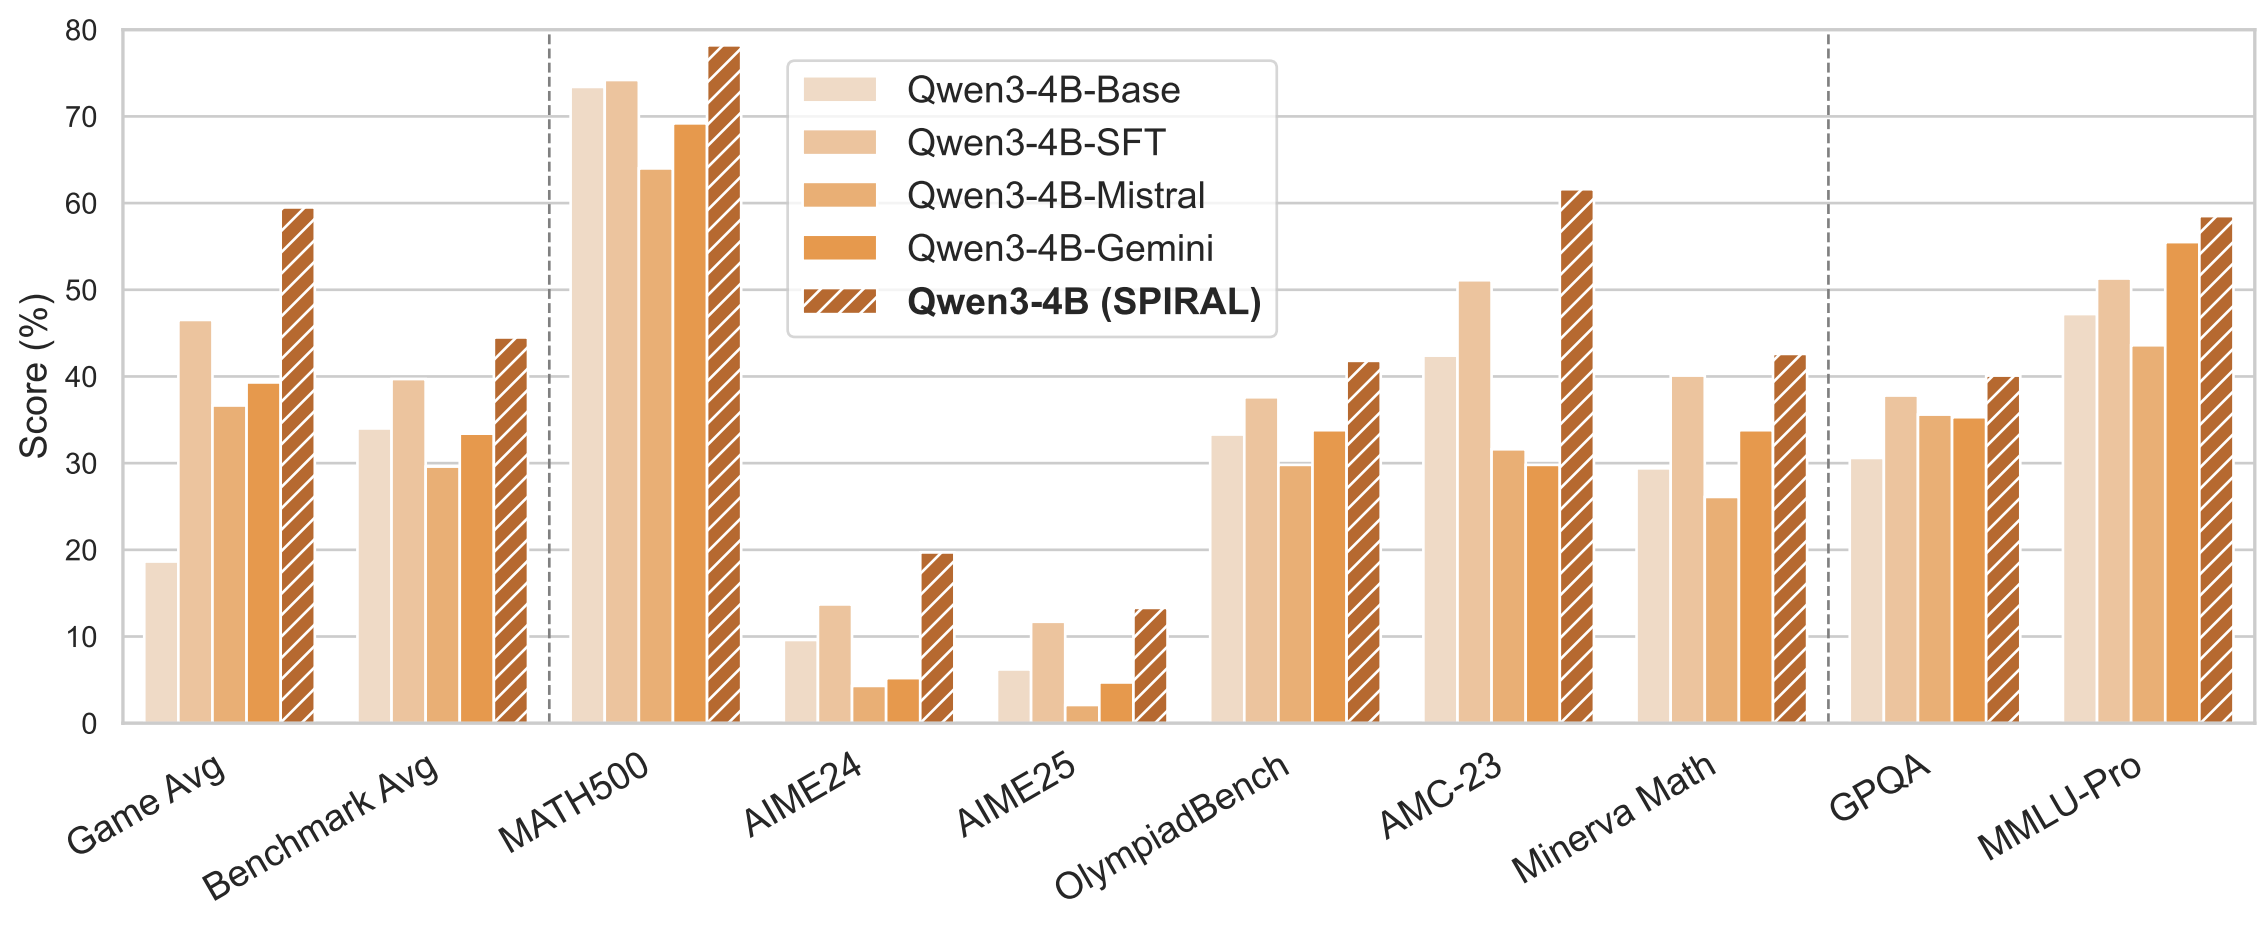

Supplement: supplementary_material [file fig1.pdf › spiral/fig1.pdf]

# Qwen3-4B Model Performance Across Benchmarks

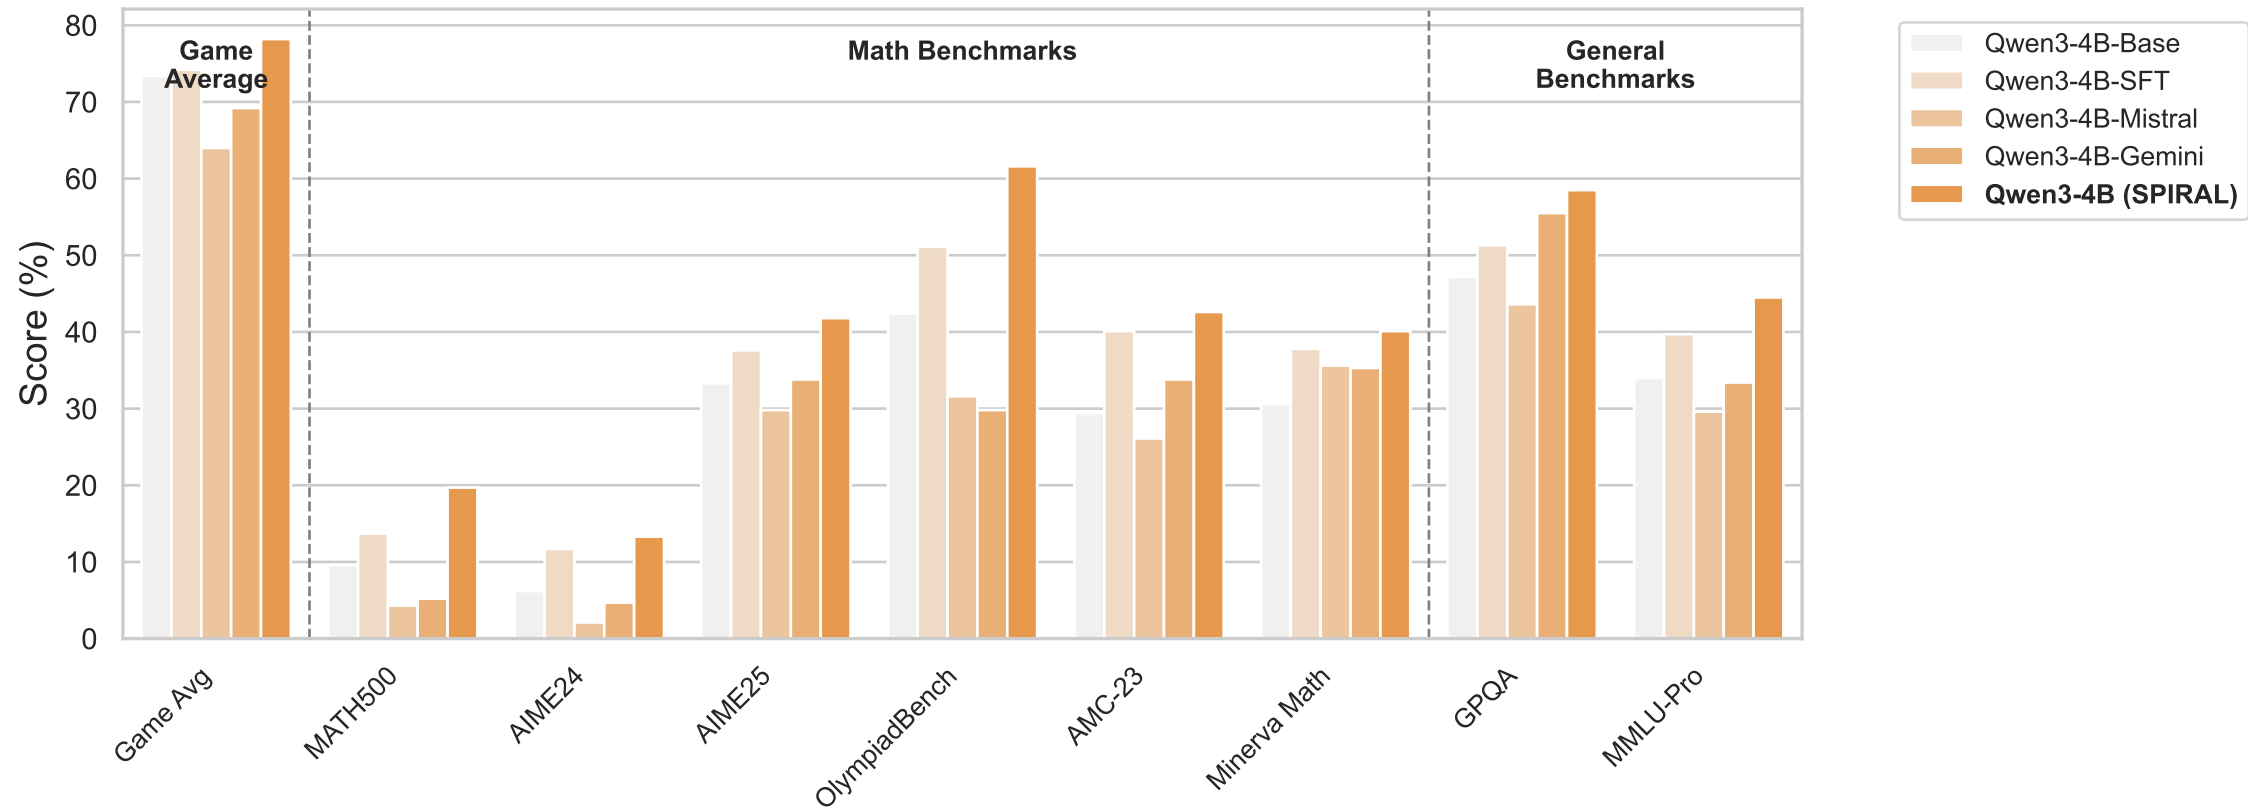

Supplement: supplementary_material [file qwen3_4b_performance_comparison.pdf › spiral/qwen3_4b_performance_comparison.pdf]
